# Supplementary material for: Activity patterns are associated with fractional lifespan, memory, and gait speed in aged dogs
Source: PubMed Central journal article supplement (PMC9929073; doi:10.1038/s41598-023-29181-z), 2023-02-14

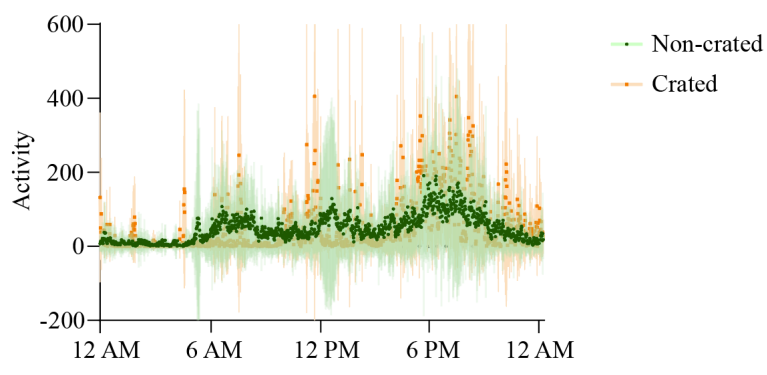

Supplement: 41598_2023_29181_MOESM2_ESM.pdf [file 41598_2023_29181_MOESM2_ESM.pdf]
